# Supplementary material for: Food insecurity modifies the association between the gut microbiome and the risk of cognitive impairment in adults
Source: Springer Nature journal article supplement (doi:10.1038/s41514-025-00241-0), 2025-06-18
Supplement: MOESM1 [file 41514_2025_241_MOESM1_ESM.pdf]

## **Food Insecurity Modifies the Association Between the Gut Microbiome and the Risk of Cognitive Impairment in Adults**

Shoshannah Eggers, PhD,<sup>1</sup> Zachary E. Hoggarth, MPH,<sup>1</sup> Kiran Nagdeo, MPH,<sup>2,3</sup> Maria J. Banas, MS,<sup>1</sup> Jamil M. Lane, PhD,<sup>2</sup> Elza Rechtman, PhD,<sup>2</sup> Chris Gennings, PhD,<sup>2</sup> Elizabeth O'Neal, PhD,<sup>4</sup> Paul E. Peppard, PhD,<sup>5</sup> Ajay K Sethi, PhD,<sup>5</sup> Nasia Safdar, MD, PhD,<sup>6</sup> Kristen MC Malecki, PhD,<sup>7</sup> Amy A. Schultz, PhD,<sup>5</sup> Vishal Midya, PhD, MSTAT<sup>2</sup>

1. Department of Epidemiology, University of Iowa College of Public Health, Iowa City, IA, USA

2. Department of Environmental Medicine, Icahn School of Medicine at Mount Sinai, New York, NY, USA

3. Department of Epidemiology, New York University School of Global Public Health, New York, NY, USA

4. Department of Community and Behavioral Health, University of Iowa College of Public Health, Iowa City, IA, USA

5. Department of Population Health Science, University of Wisconsin School of Medicine and Public Health, Madison, WI, USA

6. Department of Medicine – Division of Infectious Diseases, University of Wisconsin School of Medicine and Public Health, Madison, WI, USA

7. Department of Environmental and Occupational Health Sciences, University of Illinois Chicago School of Public Health, Chicago, IL, USA

Corresponding Author: Shoshannah Eggers, [shoshannah-eggers@uiowa.edu](mailto:shoshannah-eggers@uiowa.edu)

**Supplementary Table 1:** Association estimates of quartiled relative abundance of gut microbial ASVs (labeled at the genus level) and risk of cognitive impairment in (A) food insecure vs (B) food secure group (from Figure 1)

| Group                      | Genus                        | Family                    | $\beta$ | SE   | t-value | p-value               | FDR  |
|----------------------------|------------------------------|---------------------------|---------|------|---------|-----------------------|------|
| <b>Food Secured Group</b>  | Bacteroides                  | Bacteroidaceae            | 0.09    | 0.02 | 4.25    | $2.88 \times 10^{-5}$ | 0.01 |
|                            | Ruminococcus torques group   | Lachnospiraceae           | 0.07    | 0.02 | 3.22    | $1.44 \times 10^{-3}$ | 0.32 |
|                            | Eubacterium                  | Eubacteriaceae            | 0.05    | 0.02 | 2.81    | $5.36 \times 10^{-3}$ | 0.79 |
|                            | Christensenellaceae R7 group | Christensenellaceae       | -0.06   | 0.02 | -2.62   | $9.36 \times 10^{-3}$ | 0.91 |
| <b>Food Insecure Group</b> | Lactobacillus                | Lactobacillaceae          | 0.35    | 0.10 | 3.46    | 0.001                 | 0.45 |
|                            | Acidaminococcus              | Acidaminococcaceae        | 0.11    | 0.04 | 2.99    | 0.004                 | 0.57 |
|                            | Eubacterium                  | Eubacteriaceae            | 0.13    | 0.04 | 2.96    | 0.004                 | 0.57 |
|                            | Erysipelatoclostridium       | Erysipelatoclostridiaceae | 0.17    | 0.06 | 2.90    | 0.005                 | 0.57 |

The estimates of Beta, SE, and t-value are rounded up to two digits after the decimal point. The results are presented for all the associations with unadjusted p-values below 0.01; FDR: False discovery rate

**Supplementary Table 2:** Top 10 microbial co-occurrences from the MiCA algorithm

| Group                      | Microbial co-occurrences                                      | %of co-occurrences |
|----------------------------|---------------------------------------------------------------|--------------------|
| <b>Food Secured Group</b>  | <i>Bacteroides- Ruminococcus torques group</i>                | 43                 |
|                            | <i>Bacteroides - CAG-352F</i>                                 | 37                 |
|                            | <i>Eubacterium - Ruminococcus torques group</i>               | 26                 |
|                            | <i>Bacteroides - Eubacterium</i>                              | 23                 |
|                            | <i>CAG-352F - Ruminococcus torques group</i>                  | 23                 |
|                            | <i>Bacteroides – Eubacterium nodatum_group</i>                | 21                 |
|                            | <i>Bacteroides - Lachnospiraceae</i>                          | 20                 |
|                            | <i>Lachnospiraceae - Ruminococcus torques group</i>           | 20                 |
|                            | <i>CAG-352F - Eubacterium</i>                                 | 17                 |
|                            | <i>Eubacterium nodatum_group – Ruminococcus torques group</i> | 17                 |
| <b>Food insecure Group</b> | <i>Eubacterium - Eisenbergiella</i>                           | 21                 |
|                            | <i>Bacteroides- Eisenbergiella</i>                            | 20                 |
|                            | <i>Phascolarctobacterium- Eisenbergiella</i>                  | 16                 |
|                            | <i>Agathobacter- Eisenbergiella</i>                           | 15                 |
|                            | <i>Eisenbergiella- Lachnospiraceae</i>                        | 15                 |
|                            | <i>Eisenbergiella- Streptococcus</i>                          | 14                 |
|                            | <i>Eisenbergiella- Catenibacterium</i>                        | 14                 |
|                            | <i>Agathobacter- Eisenbergiella</i>                           | 13                 |
|                            | <i>UCG-002 - Eisenbergiella</i>                               | 8                  |
|                            | <i>Eubacterium – Bacteroides</i>                              | 8                  |

The food-secured group had 769 co-occurring microbial combinations, whereas the food-insecure group had 267 co-occurring microbial combinations. For the food-secured group, we also identified three ordered microbial co-occurrences: (1) *Bacteroides- CAG-352F- Eubacterium* (3% co-occurrence), and (2) *Bacteroides- CAG-352F- Ruminococcus torques group* (3% co-occurrence). All the downstream two-ordered microbial co-occurrences of the four-ordered co-occurrence are within the top 10, and there is evidence of further three-ordered co-occurrence (downstream from the same four order), as noted here. For the food-insecure group, *Eubacterium - Eisenbergiella* forms a closed group. Although *Eubacterium – Eisenbergiella – Bacteroides* can be used as a closed-loop microbial clique, the multiple occurrences of *Eisenbergiella* throughout raises the chances of false positives. Therefore, we made a conservative choice and chose only *Eubacterium – Eisenbergiella* as the closed loop clique. The two-ordered microbial co-occurrences that form the closed loop are italicized.

**Supplementary Table 3:** Association estimates from *Figure 2*

| Group                                                                            | Genus                      | $\beta$ | SE   | 95% CI     | Permutation-based robust p-value |
|----------------------------------------------------------------------------------|----------------------------|---------|------|------------|----------------------------------|
| <i>Clique of Ruminococcus torques, Bacteroides, CAG-352F, and/or Eubacterium</i> | <i>Food Secured group</i>  | 0.10    | 0.02 | 0.05, 0.15 | $3 \times 10^{-5}$               |
|                                                                                  | <i>Food Insecure Group</i> | 0.07    | 0.03 | 0.01, 0.12 | 0.01                             |
| <i>Clique of Eisenbergiella and/or Eubacterium</i>                               | <i>Food Secured group</i>  | 0.05    | 0.01 | 0.02, 0.08 | $7 \times 10^{-4}$               |
|                                                                                  | <i>Food Insecure Group</i> | 0.29    | 0.07 | 0.14, 0.44 | $< 10^{-5}$                      |

The permutation-based p-value was repeated  $10^5$  times

**Supplementary Table 4:** Association estimates from microbial clique and food security status interaction terms from the overall model

| Interaction terms                                                                                           | $\beta$ | SE   | 95% CI      | Model-based p-value | Permutation-based robust p-value |
|-------------------------------------------------------------------------------------------------------------|---------|------|-------------|---------------------|----------------------------------|
| <i>Food insecurity indicator: Clique of Ruminococcus torques, Bacteroides, CAG-352F, and/or Eubacterium</i> | -0.15   | 0.08 | -0.31, 0.02 | 0.08                | $< 10^{-4}$                      |
| <i>Food insecurity indicator: Clique of Eisenbergiella and/or Eubacterium</i>                               | 0.23    | 0.10 | 0.03, 0.44  | 0.03                | $< 10^{-4}$                      |

The permutation-based p-value was repeated  $10^4$  times
